# Supplementary material for: Deep Transfer Learning Approach for Automatic Recognition of Drug Toxicity and Inhibition of SARS-CoV-2
Source: PubMed Central journal article supplement (PMC8066066; doi:10.3390/v13040610), 2021-04-02
Supplement: viruses-13-00610-s001.pdf [file viruses-13-00610-s001.pdf]

Figure S1

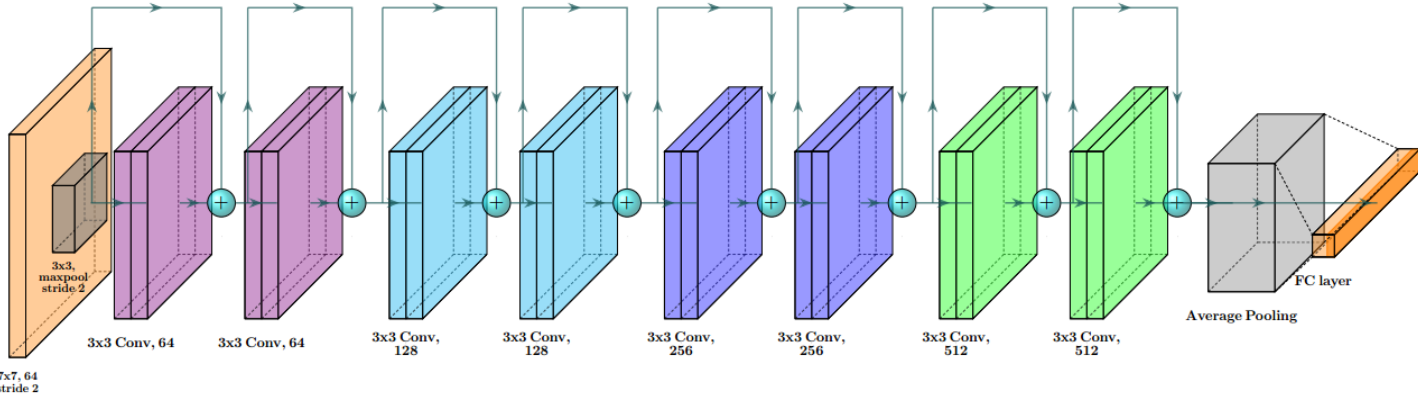

Figure S1. ResNet18 Architecture.

The Figure shows the Deep Learning architecture we used for the 'CPenet', 'IFnet' and 'CPETOXnet' for Transfer Learning. The input shape was a 224x224x3 pixel tile.

# Figure S2

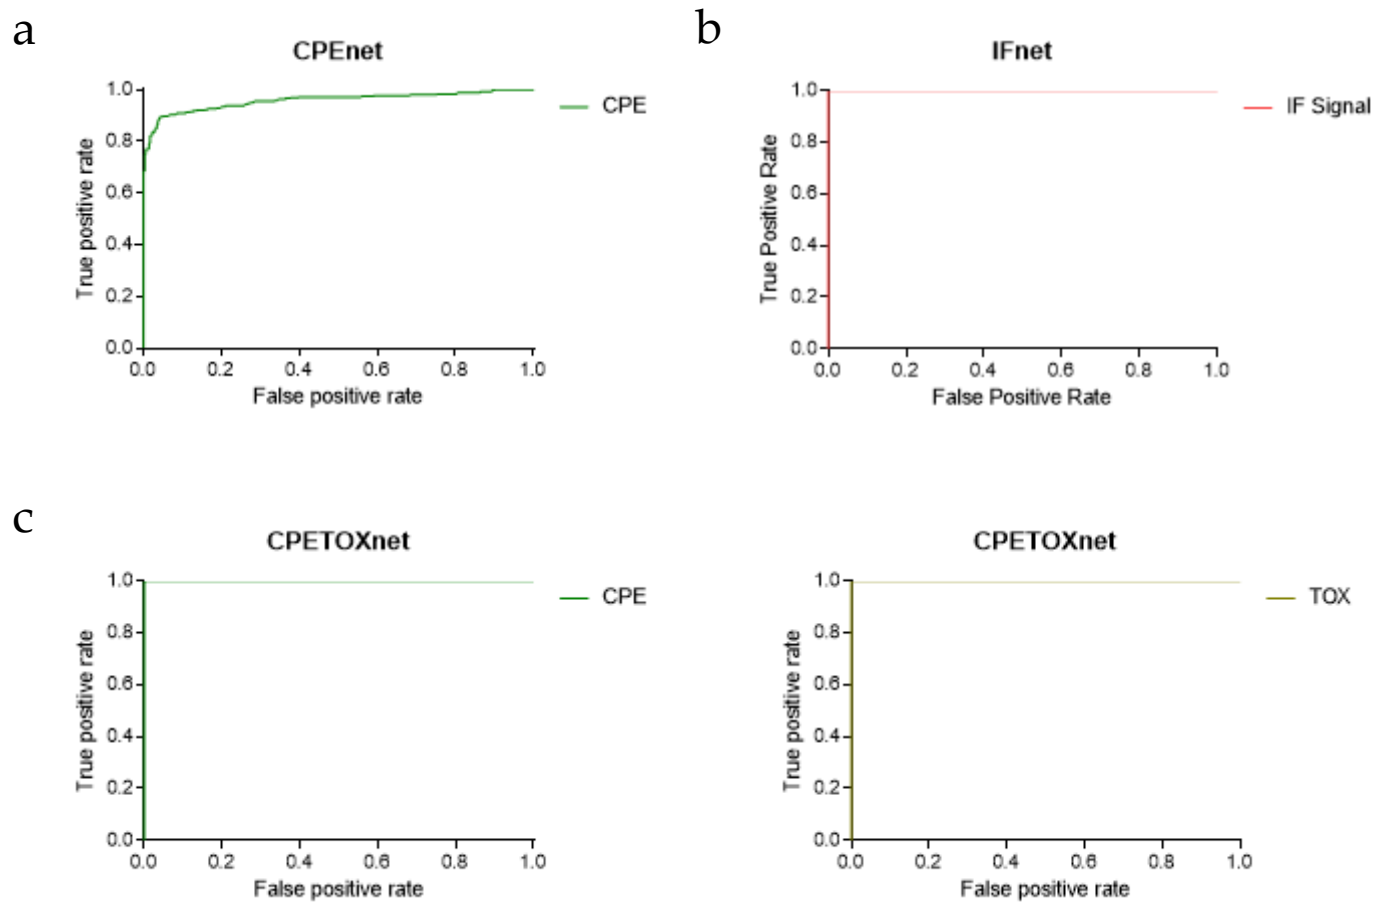

**Figure S2. ROC curve of the trained networks.**

The ROC curve of the trained (a) 'CPENet' for CPE, (b) 'IFnet' for CPE and (c) 'CPETOXnet' for CPE and Tox is displayed, calculated by Matlab.

# Figure S3

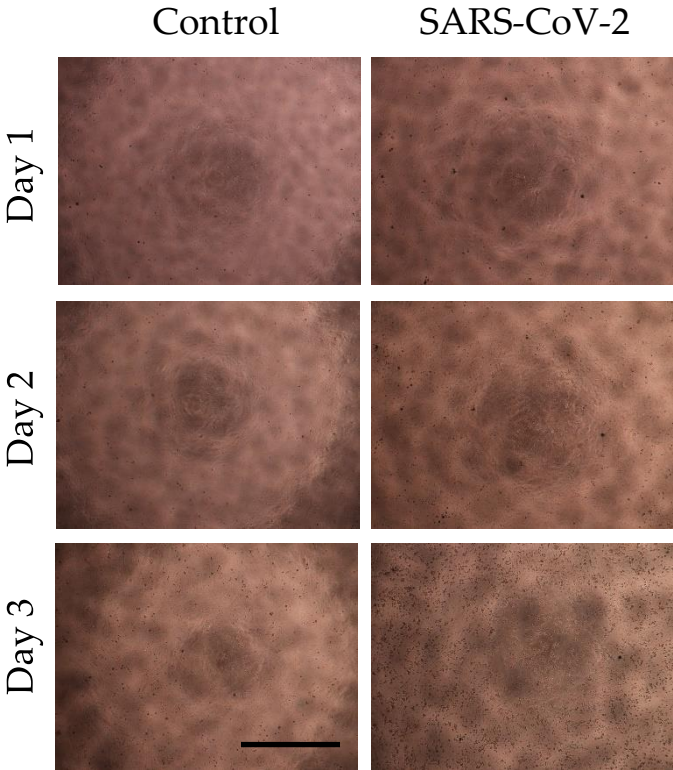

**Figure S3. SARS-CoV-2 infection induces CPE at day 3 post infection.**

Vero cells were infected with SARS-CoV-2 at an MOI of 0.03. Images were taken 1, 2, and 3 days after infection or without infection (scale bar = 1mm,  $n = 48$ ).

# Figure S4

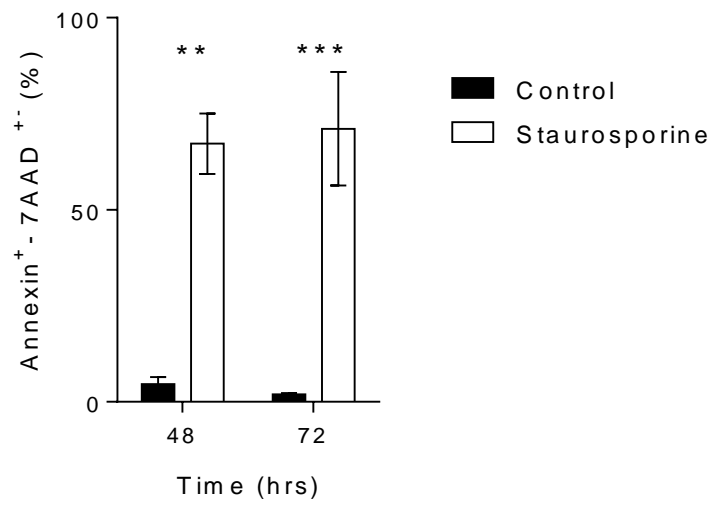

**Figure S4: Apoptosis assay of Vero cells stimulated with Staurosporine.**

Vero cells were treated with 5 $\mu$ M Staurosporine or DMSO in control group. Graph represents AnnexinV+ 7AAD- combined with AnnexinV 7AAD double positive cells measured 48 and 72h after treatment ( $n = 3$ , \*\* $P < 0.01$ , \*\*\* $P < 0.001$ ).

Figure S5

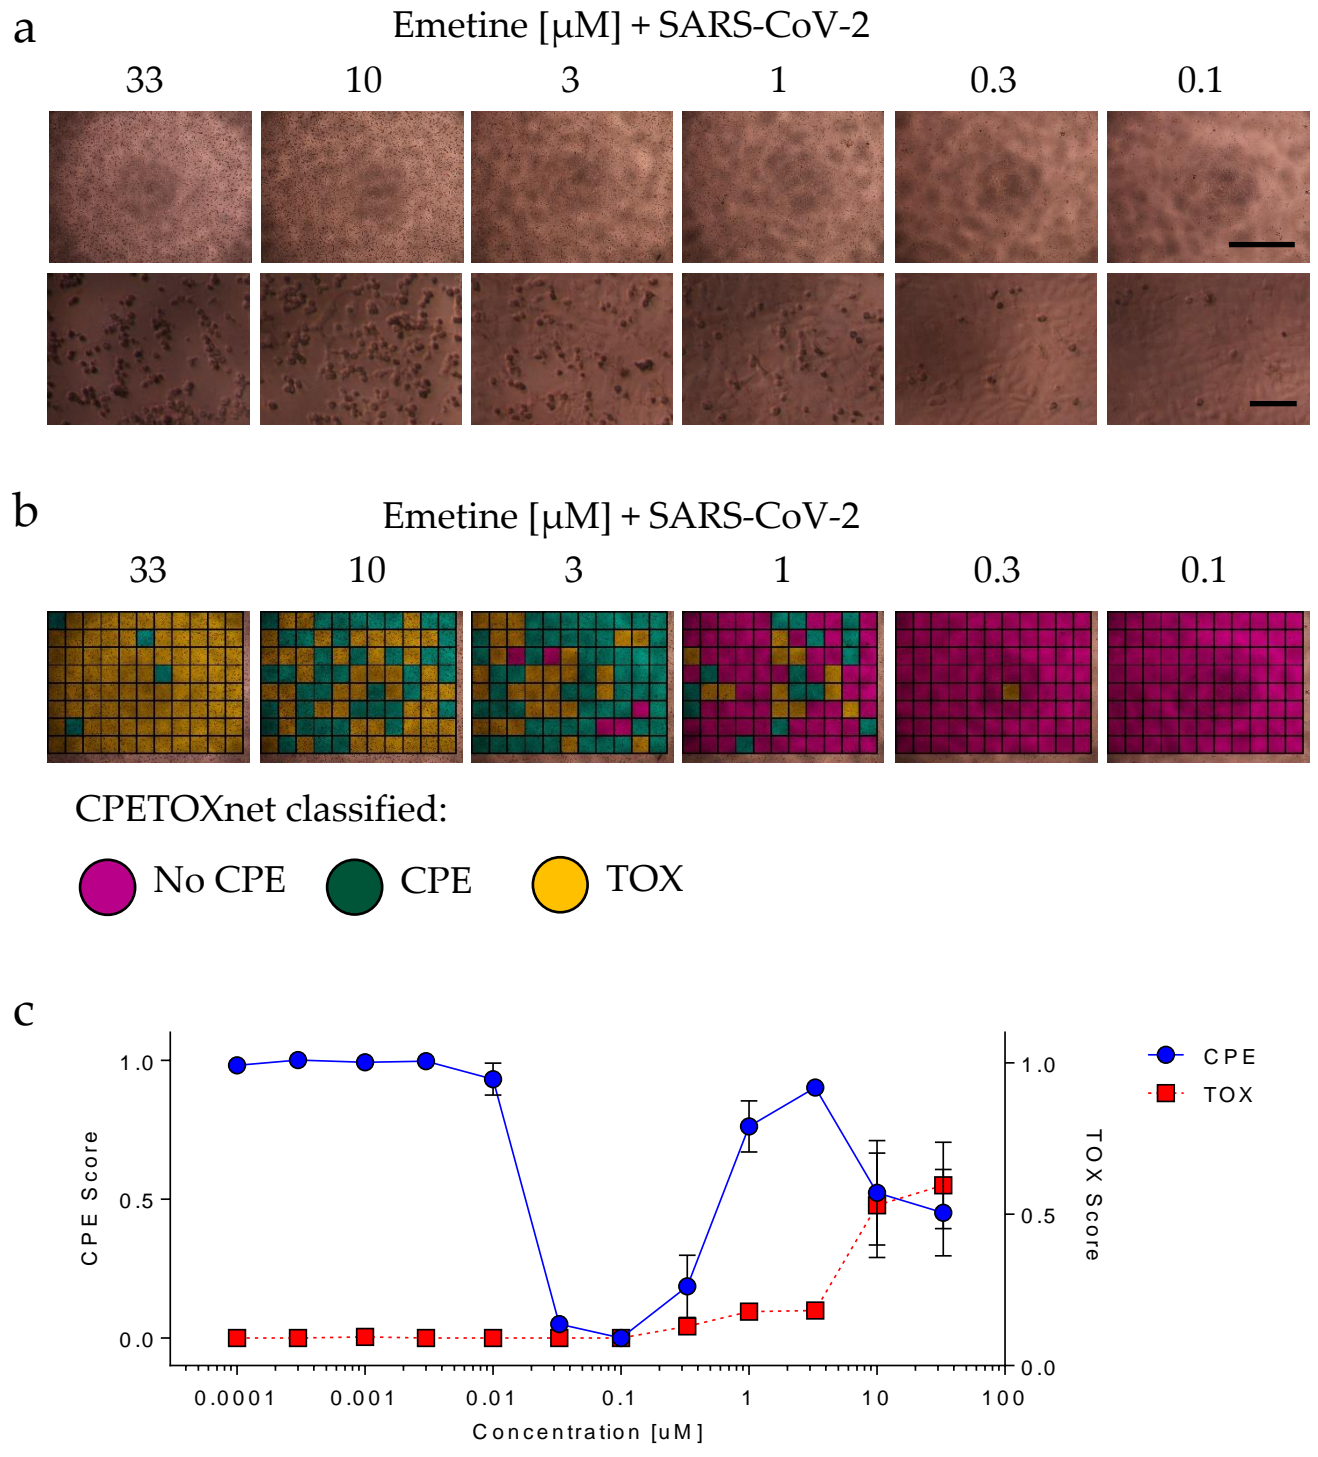

**Figure S5: Emetine induces toxicity and CPE in infected Vero cells.**

Vero cells were treated with the indicated concentrations of emetine and infected with SARS-CoV-2 at an MOI of 0.03. (a) 3 days post infection images were taken (one representative set of  $n = 5$  is shown, scale bar = 1mm for upper panels and scale bar = 100 $\mu\text{m}$  for lower panels). (b) Images as in (a) were classified by 'CPETOXnet' as indicated. (c) Images were taken 3 days after infection. CPE Score (blue) and TOX Score (red) were determined by 'CPETOXnet' and are shown in a concentration dependent manner ( $n = 3$ ).

Figure S6

a Ganetespib

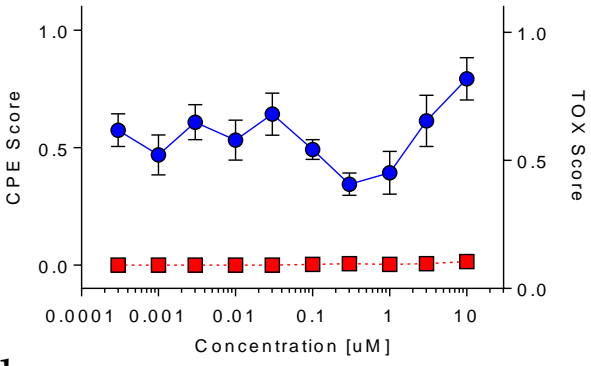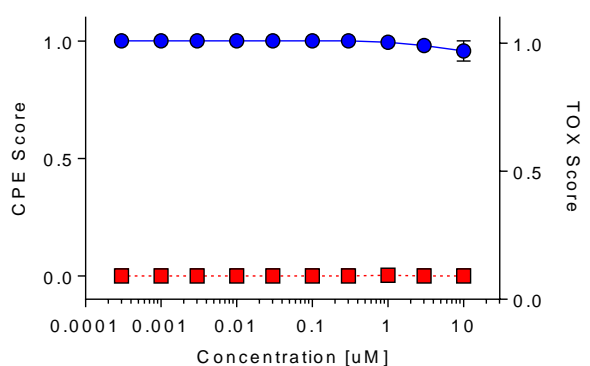

b PUH71

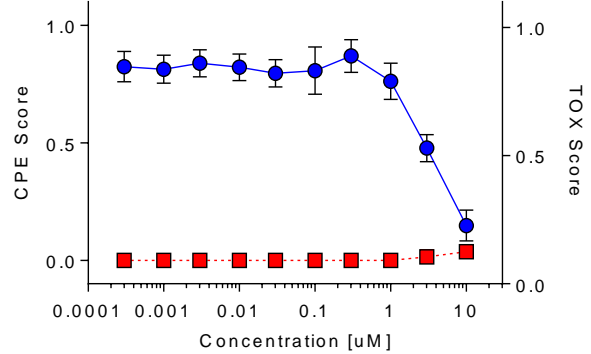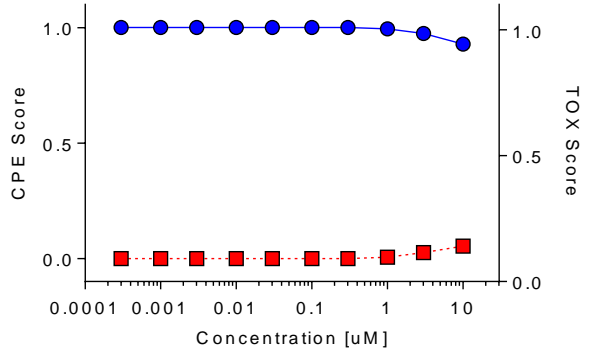

c AUY922 (Luminespib)

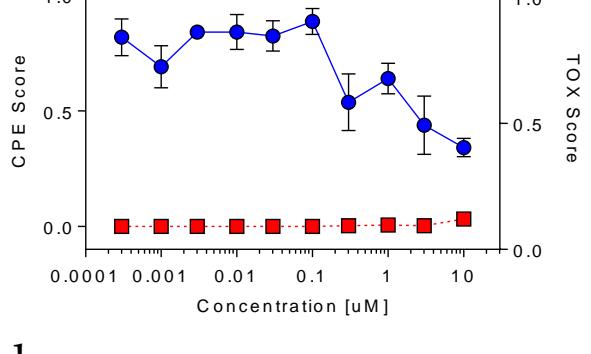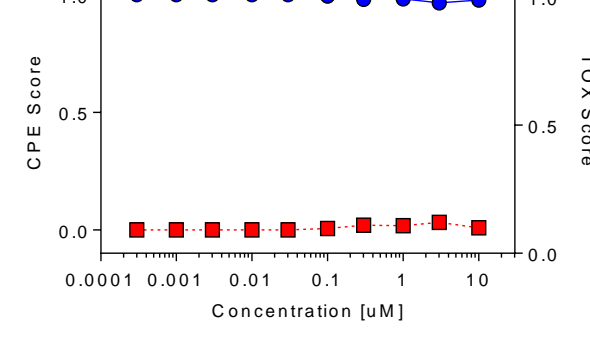

d NVP-HSP990

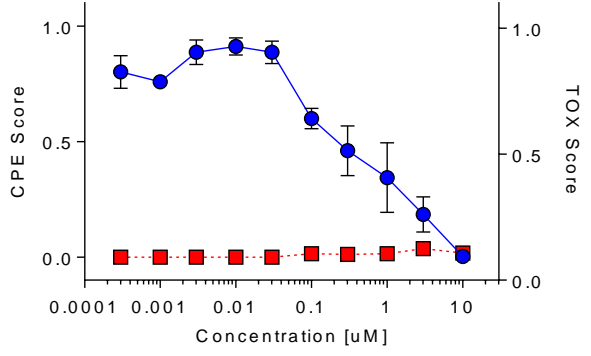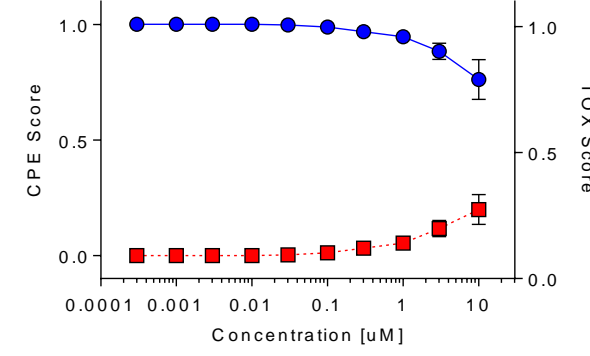

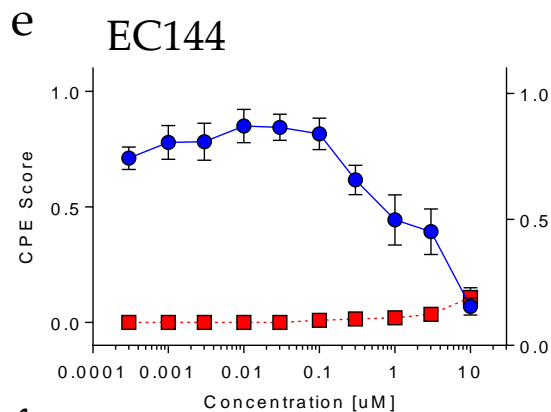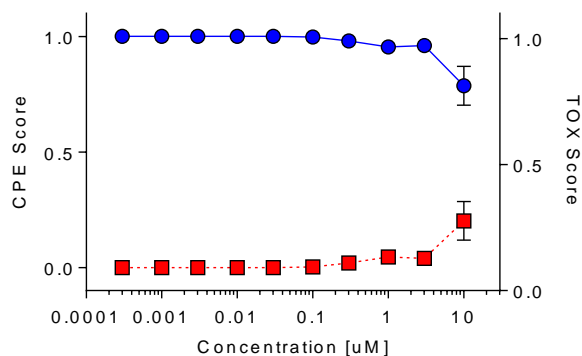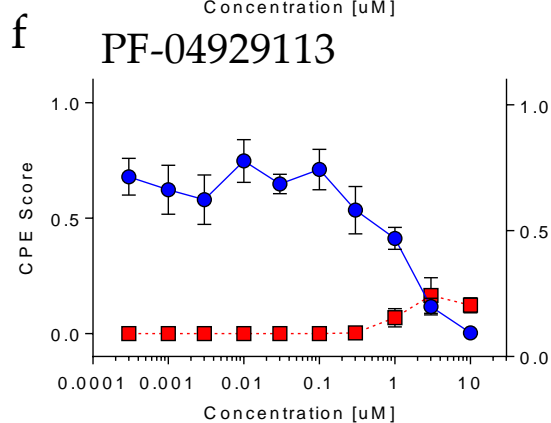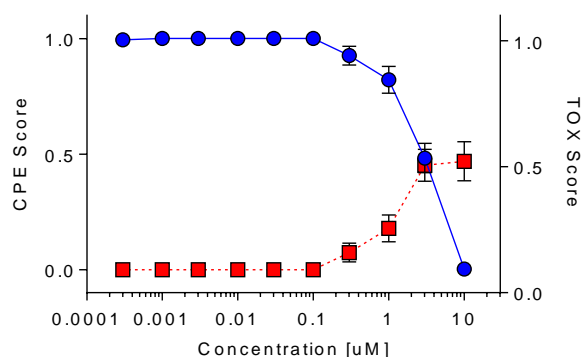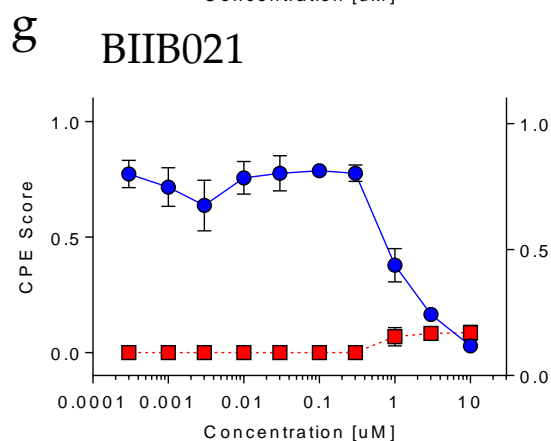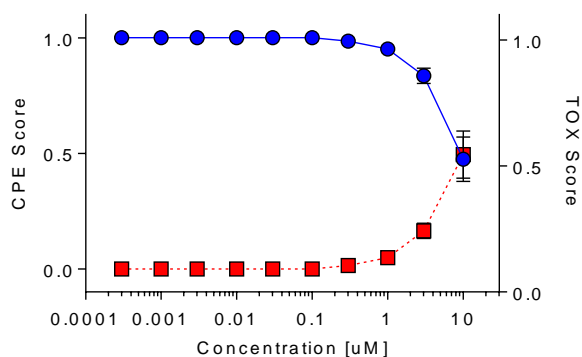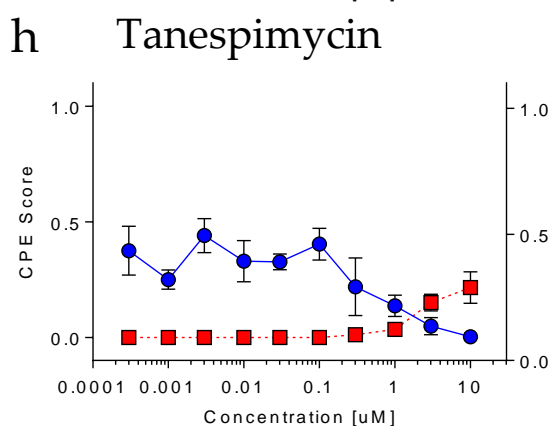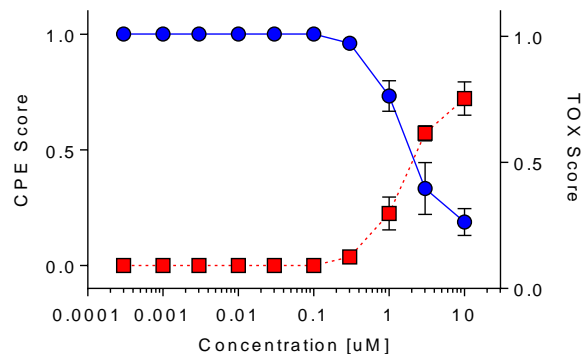

**Figure S6: Drugscreening of HSP90i.**

(a-g) Vero cells were treated with the indicated concentration of ganetespib (a), PUH71 (b), AUY922 (Luminespib) (c), NVP-HSP990 (d), EC 144 (e), PF-04929113 (f), BIIB021 (g) and tanespimycin (h). Images were taken 2 days (left panels), or 3 days (right panels) after infection with SARS-CoV-2 at an MOI of 0.03. CPE Scores (blue) and TOX Scores (red) were determined by 'CPETOXnet' and are shown in a concentration dependent manner ( $n = 4$ ).

# Figure S7

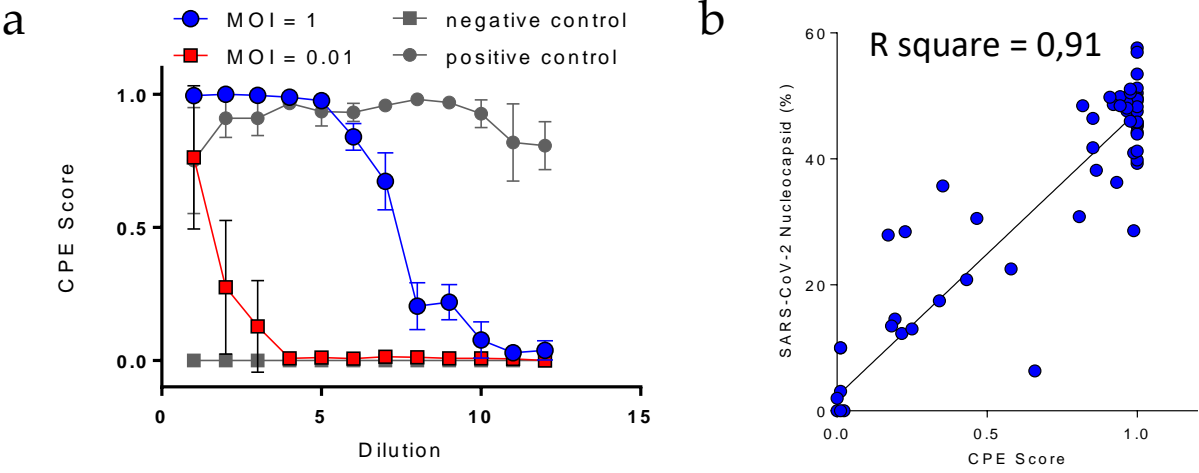

**Figure S7: Adjusting the Analysis of the CPE Score for Python.**

Comparison of the CPE Score analysed with Python. (a) Reanalysis of Figure 2d with the Python Deep Transfer Learning source code. Vero cells were infected with either MOI of 1 (blue line) or 0.001 (red line) of SARS-CoV-2 followed by serial 3-fold dilutions and the CPE Score was determined from bright field images. Grey closed circles indicate positive control (MOI=0.03), closed grey squares indicate negative control ( $n = 5$  per well (control);  $n = 12$  per well (dilution)). (b) Means of the quantification of immunofluorescence from each of 4 repeated experiments as in Figure 2e is shown as a dependence of means of ‘CPEnet’ analysed with Python ( $n = 76$ ).
